# Supplementary material for: Impact of Extreme Weather Disasters on China’s Barley Industry under the Background of Trade Friction—Based on the Partial Equilibrium Model
Source: MDPI journal article supplement (doi:10.3390/foods11111570), 2022-05-26
Supplement: s1 [file s1]

|                                                                            | $\alpha^{IBP_c}$      | $DBP_t$              | $EX_{ct}$             | $DCP_t$              | R <sup>2</sup> |
|----------------------------------------------------------------------------|-----------------------|----------------------|-----------------------|----------------------|----------------|
| Parameter                                                                  | 3.1915***<br>(0.5264) | 0.3320*<br>(0.1727)  | 1.1233<br>(0.2932)    | 0.4610**<br>(0.1882) | 0.81           |
| <b>Transfer equation of import price between China and France</b>          |                       |                      |                       |                      |                |
|                                                                            | $\alpha^{IBP_f}$      | $DBP_t$              | $EX_{ft}$             | $DCP_t$              | R <sup>2</sup> |
| Parameter                                                                  | 2.2037*<br>(1.0018)   | 0.4021<br>(0.2815)   | 1.3421***<br>(0.4592) | 0.3458<br>(0.3084)   | 0.67           |
| <b>Transfer equation of import price between China and other countries</b> |                       |                      |                       |                      |                |
|                                                                            | $\alpha^{IBP_o}$      | $DBP_t$              | $EX_{ot}$             | $DCP_t$              | R <sup>2</sup> |
| Parameter                                                                  | 6.7757***<br>(1.7543) | 0.5327**<br>(0.2043) | -0.7649<br>(0.8246)   | -0.044<br>(0.3066)   | 0.69           |

Note: Numbers in parentheses are t-statistics values.\*\*\*-1% significance level,\*\*-5%significance level;\*-10% significance level
